# Supplementary material for: Mutation of regulatory phosphorylation sites in PFKFB2 does not affect the anti-fibrotic effect of metformin in the kidney
Source: PubMed Central journal article supplement (PMC9910667; doi:10.1371/journal.pone.0280792), 2023-02-09

27/2/20.  
PFK WT + K1 2Mek.

TEC  
5 min.

S79.

Buc.

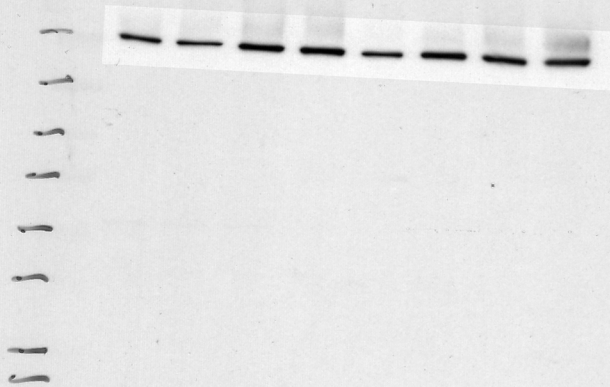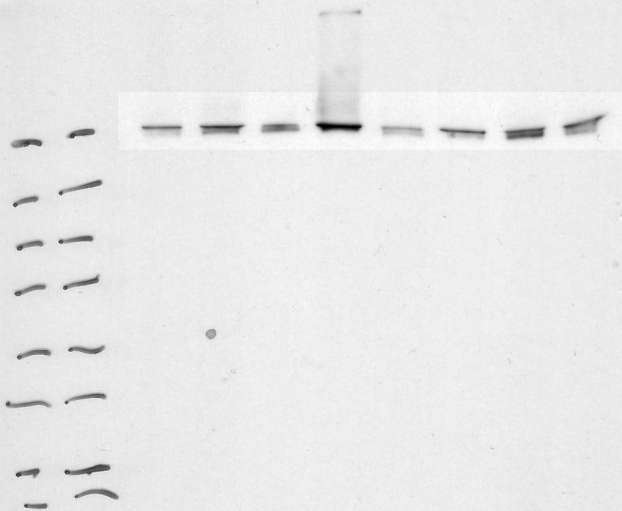

286

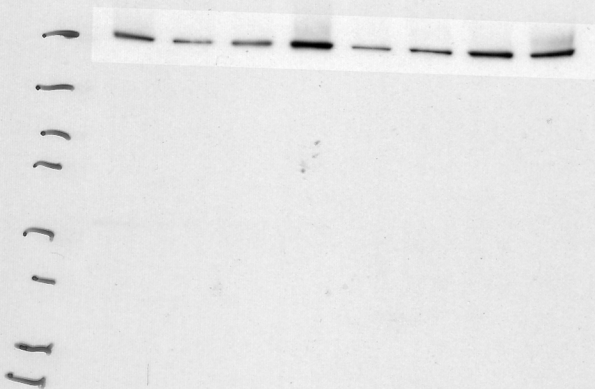

Dant.

25/2/20

PFK WOX Metb

S483/2ADPH

2 MV

*[Handwritten signature]*

*[Handwritten signature]*

*[Handwritten signature]*

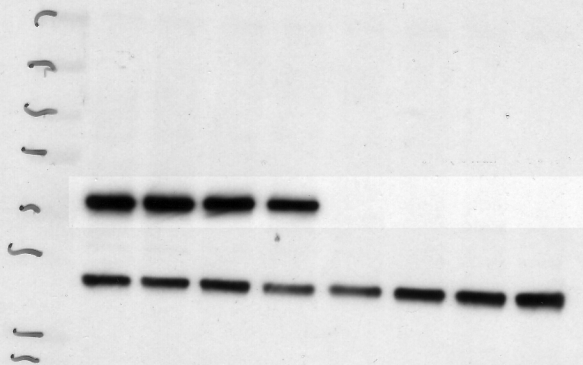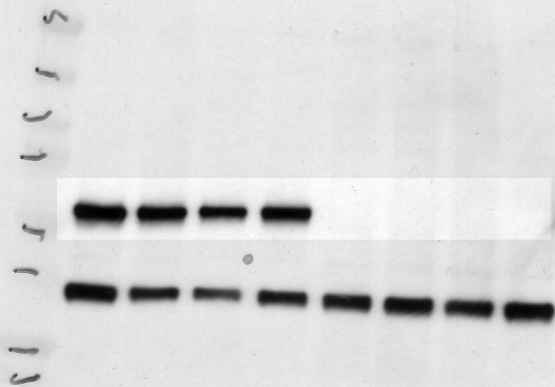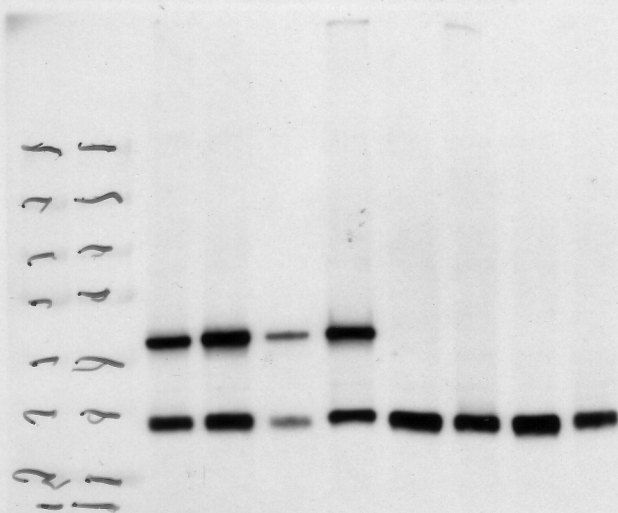

STRATAGENE®

STRATAGENE

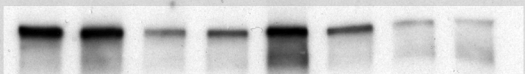

1  
1  
2  
2  
2  
1  
1  
1

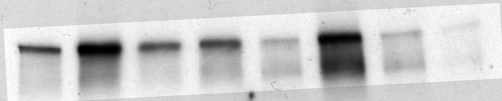

1  
1  
2  
1  
1  
1  
1

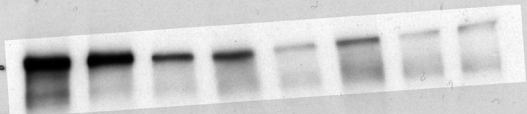

1  
1  
1  
1  
1  
1  
1  
1  
1  
1

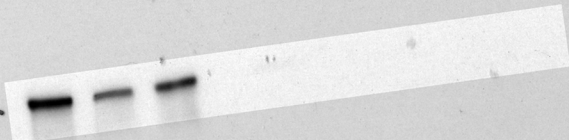

1  
1  
1  
1  
1  
1  
1  
1  
1  
1

1D 1B

2B 2D

5/1/20 -  
Fildonethin  
PKR was r. w. m  
7 sec.

2B 2D  
D B.

25/1/20  
CPT4  
1 min  
PFR wt/ki + Met.  
und

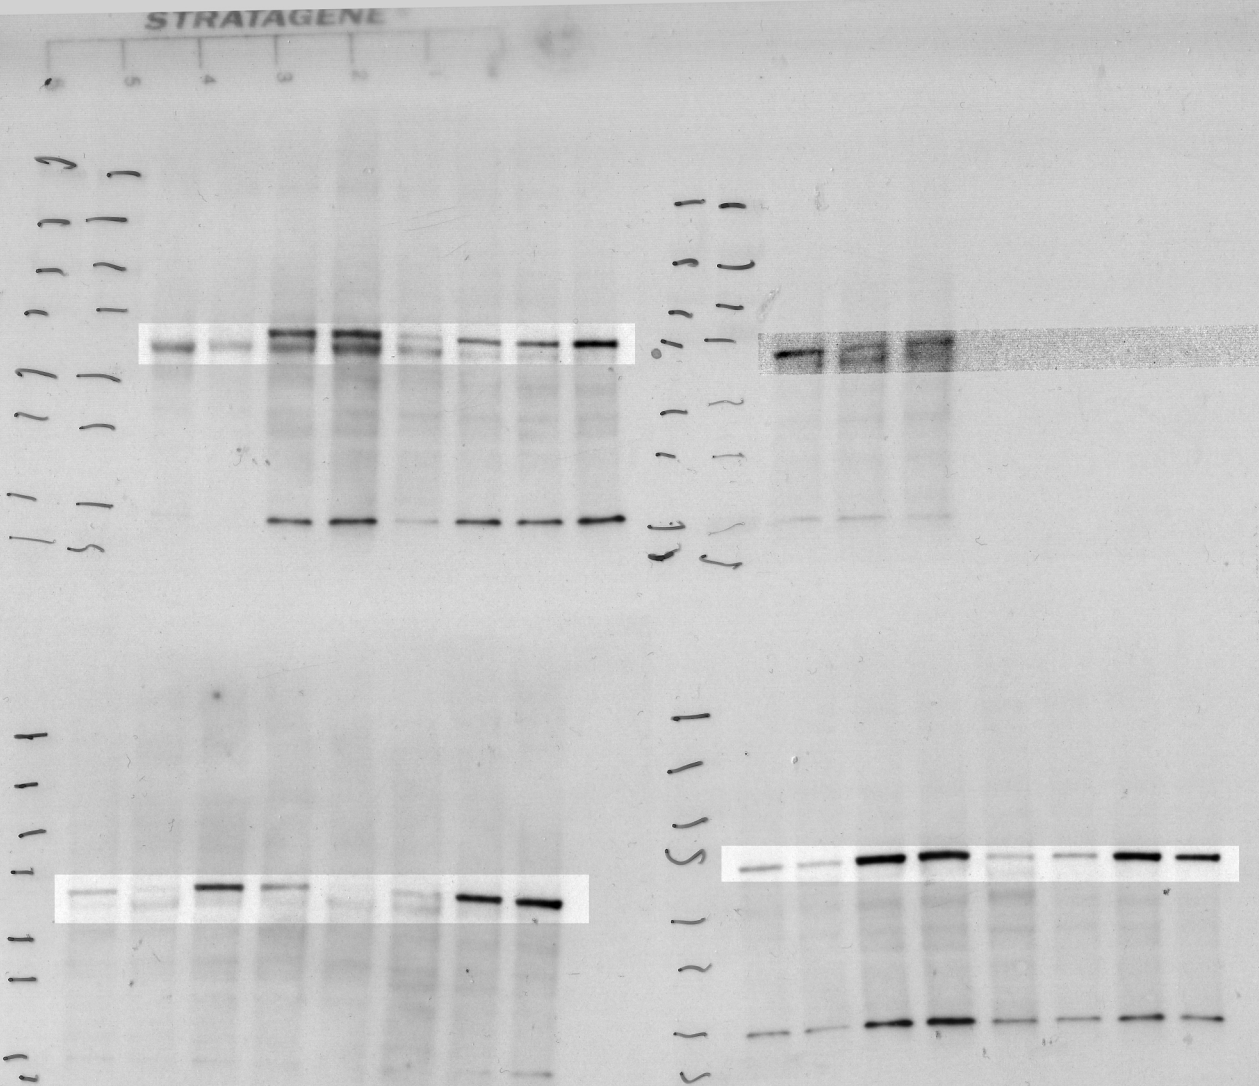

STRATAGENE®

2D 2B  
1B 1D

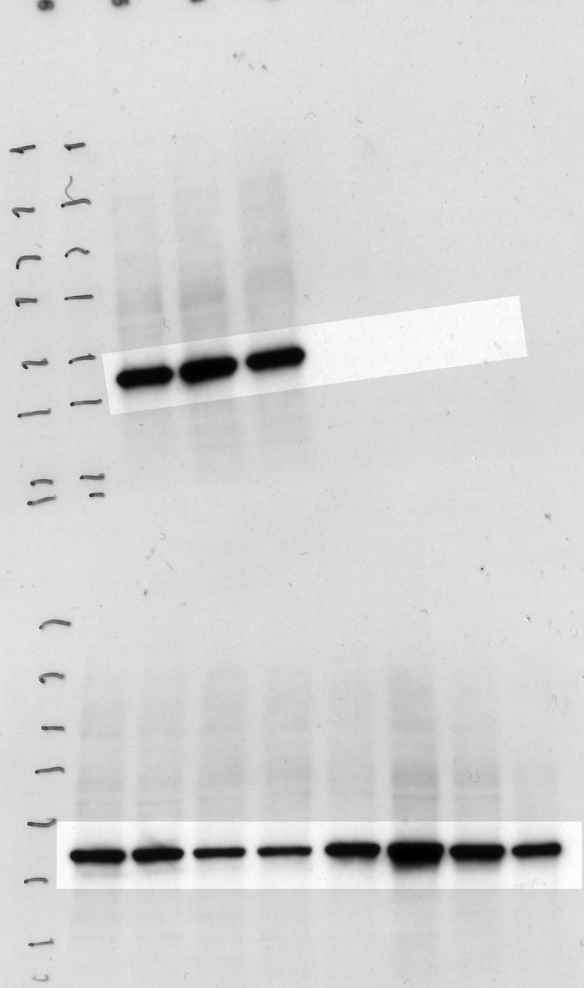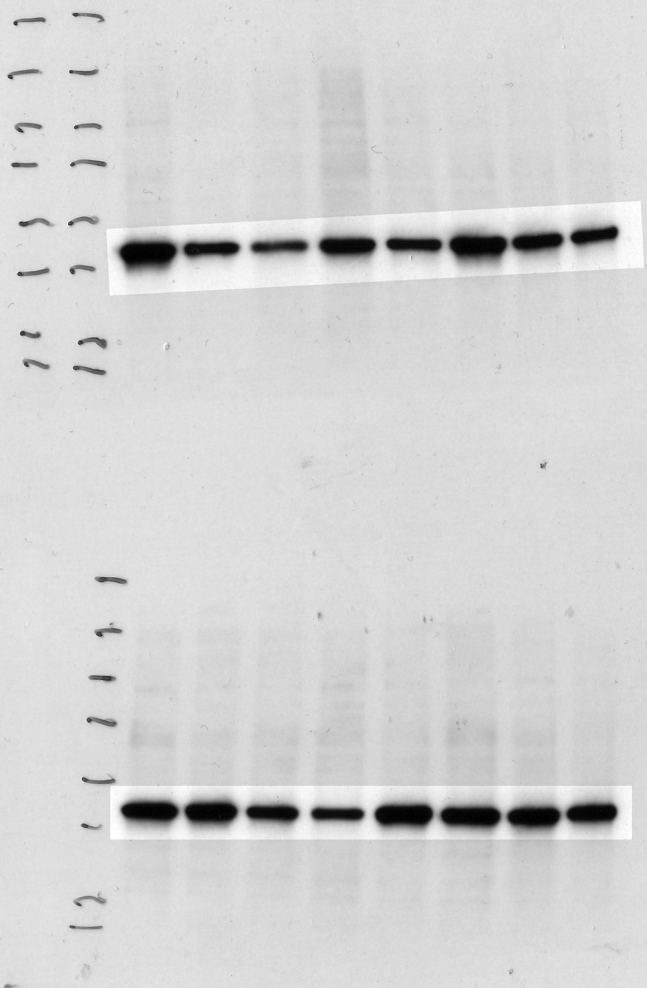

4/1/20  
 A-SMD.  
 PFK-WB vs.  
 XRD rM  
 40 sec

CRATIGENE

29/1/20

CRPDH

3 2D

2B D

PSKWT/RI-Met

WB

1ml

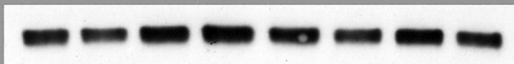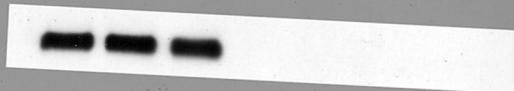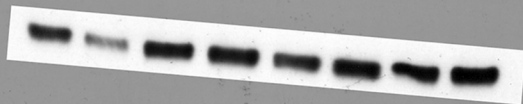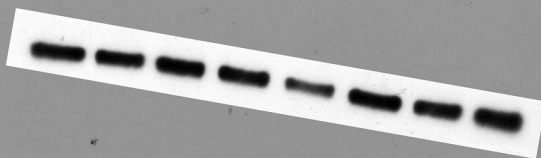

STRATAGENE

D B.  
2B 2B

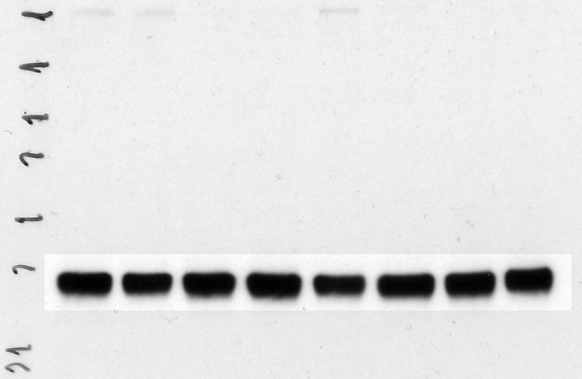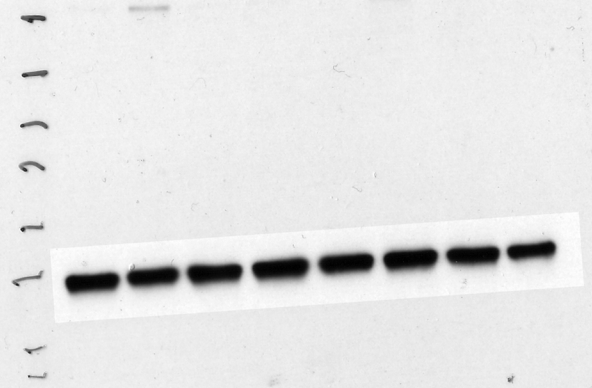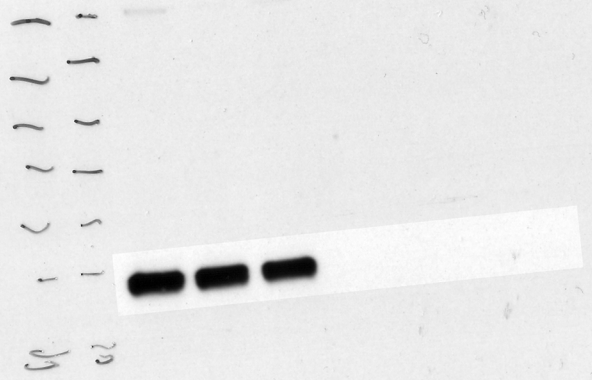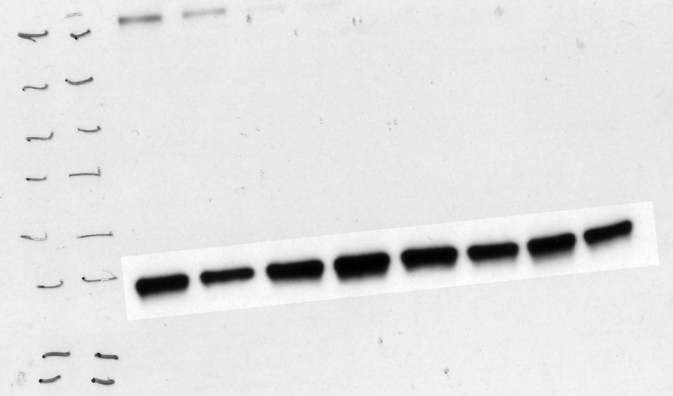

6/1/02  
 GAPD > 4x  
 PFK W0 vs. W02  
 30 sec.

8/10/22

PEK WD vs. UW → gel.

Total PEKWB 3

45 seconds.

538

B

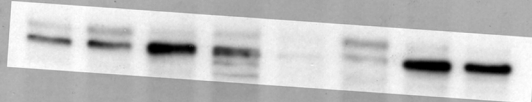

D

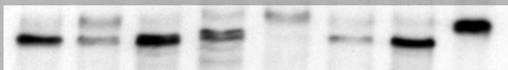

2B

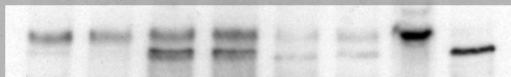



9/10/22  
PFRUCO vs. Wb + mea  
Total ACC + GAPD  
1 min

Blue.

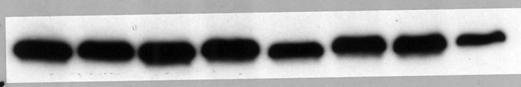

2 Blue.

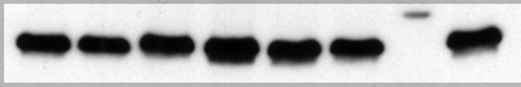

Deal.

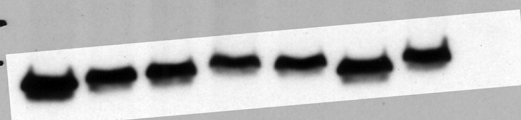

STRATAGENE®  
1  
2  
3  
4  
5  
6

STRATAGENE®

215  
213 D

STANDARD

1 2 3 4 5 6 7 8 9 10 11 12 13 14 15 16 17 18 19 20 21 22 23 24 25 26 27 28 29 30 31 32 33 34 35 36 37 38 39 40 41 42 43 44 45 46 47 48 49 50 51 52 53 54 55 56 57 58 59 60 61 62 63 64 65 66 67 68 69 70 71 72 73 74 75 76 77 78 79 80 81 82 83 84 85 86 87 88 89 90 91 92 93 94 95 96 97 98 99 100

1 2 3 4 5 6 7 8 9 10 11 12 13 14 15 16 17 18 19 20 21 22 23 24 25 26 27 28 29 30 31 32 33 34 35 36 37 38 39 40 41 42 43 44 45 46 47 48 49 50 51 52 53 54 55 56 57 58 59 60 61 62 63 64 65 66 67 68 69 70 71 72 73 74 75 76 77 78 79 80 81 82 83 84 85 86 87 88 89 90 91 92 93 94 95 96 97 98 99 100

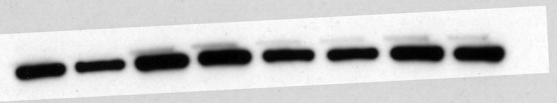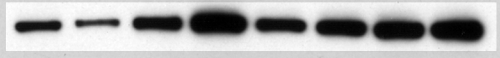

1 2 3 4 5 6 7 8 9 10 11 12 13 14 15 16 17 18 19 20 21 22 23 24 25 26 27 28 29 30 31 32 33 34 35 36 37 38 39 40 41 42 43 44 45 46 47 48 49 50 51 52 53 54 55 56 57 58 59 60 61 62 63 64 65 66 67 68 69 70 71 72 73 74 75 76 77 78 79 80 81 82 83 84 85 86 87 88 89 90 91 92 93 94 95 96 97 98 99 100

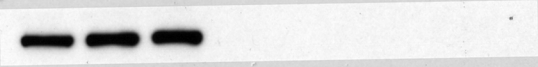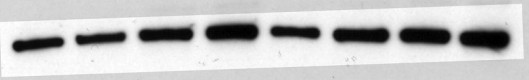

21/1/2  
Haskins  
FKW + K:  
WD  
1mk)

STRATAGENE®

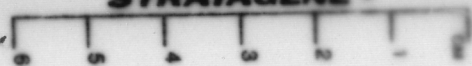

STRATAGENE®

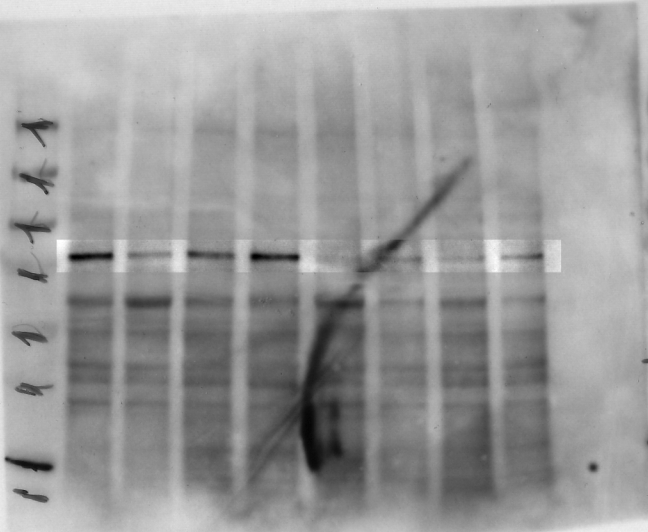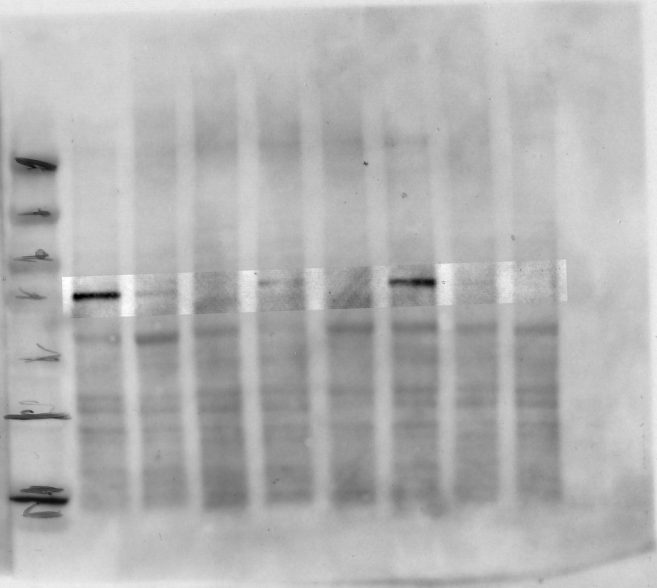

B D  
23 27

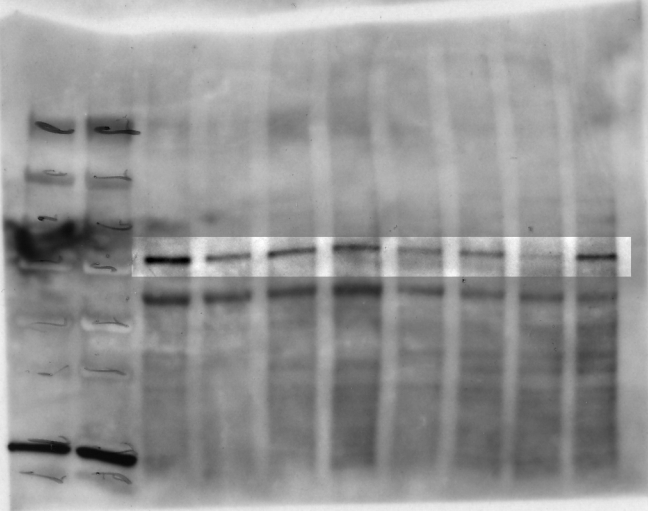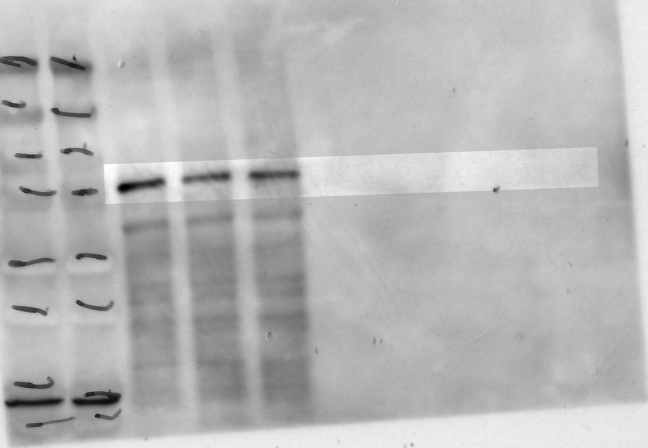

06/2/22  
PF 141  
SIR W T (12)  
MCE  
A m m

STRATAGENE®

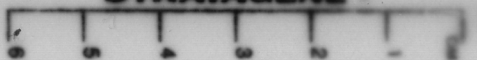

STRATAGENE®

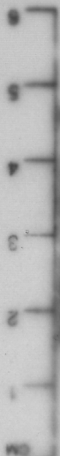

11 11 11 11 11 11 11 11

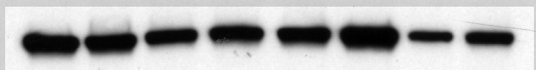

11 11 11 11 11 11 11 11

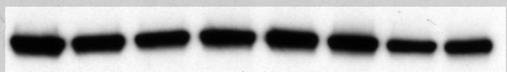

11 11 11 11 11 11 11 11

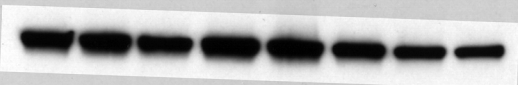

11 11 11 11 11 11 11 11

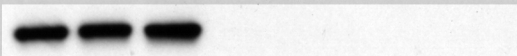

D 12  
20 21

29/2/20  
ppk with k1  
+ med  
30 sec  
PHAD 2

STRATAGENE®

STRATAGENE®

D B  
ZB Z13

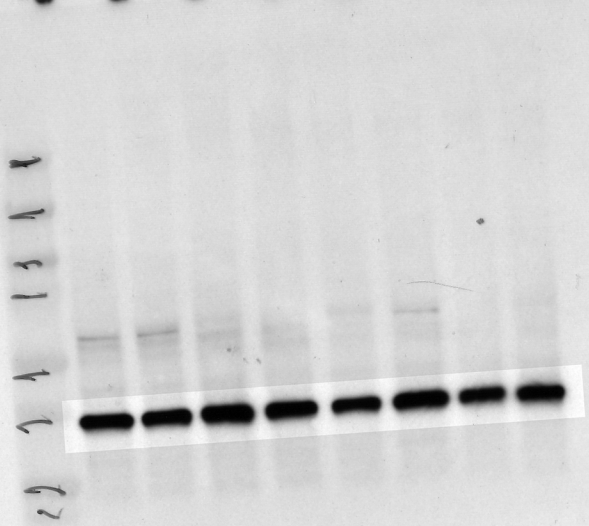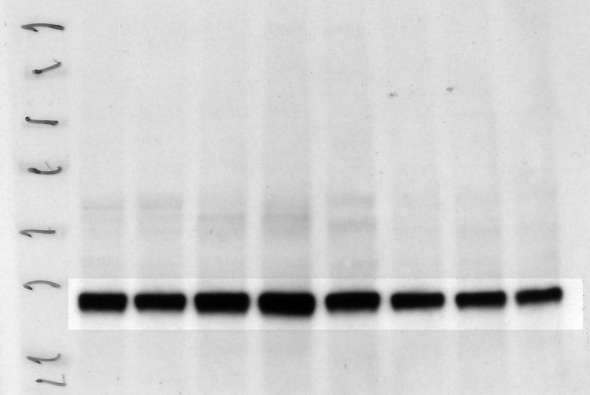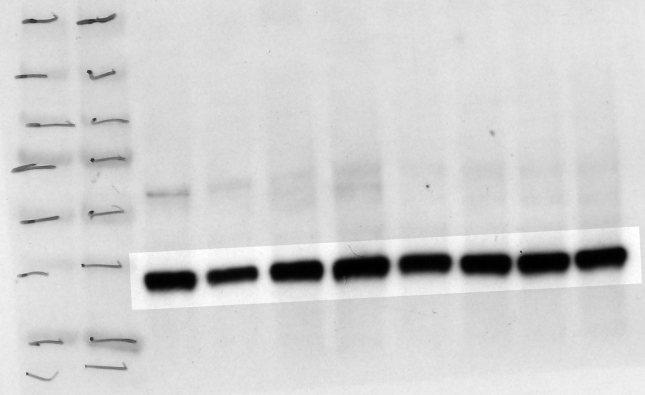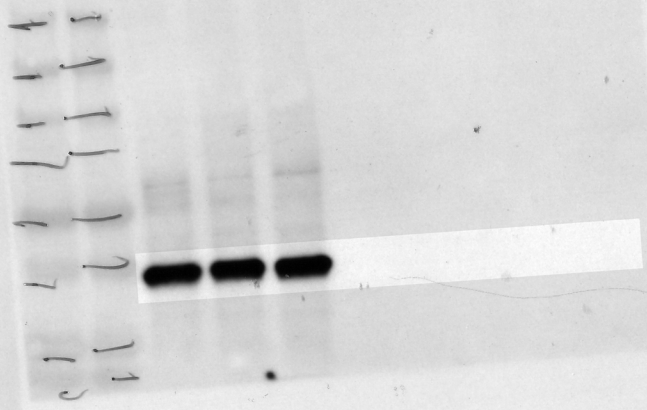

25/12/20  
 PCR was performed  
 with  
 CARDIA  
 15 min

CRATIGENE

29/1/20

CRPDH

3 2D

2B D

PSKWT/RI-Met

WB

1ml



Supplement: pone.0280792.s002.pdf [file pone.0280792.s002.pdf]
